# Supplementary material for: The Role of Standardized Phase Angle in the Assessment of Nutritional Status and Clinical Outcomes in Cancer Patients: A Systematic Review of the Literature
Source: MDPI journal article supplement (doi:10.3390/nu15010050), 2022-12-22
Supplement: s1 [file s1]

**Supplementary Table S1. Search Strategy Details performed at April 17th, 2022.**

| Step             | Search Strategy                                                                                                                                                                                                                                                                                                                                                                                                                                                                                                                                                     | Results   |
|------------------|---------------------------------------------------------------------------------------------------------------------------------------------------------------------------------------------------------------------------------------------------------------------------------------------------------------------------------------------------------------------------------------------------------------------------------------------------------------------------------------------------------------------------------------------------------------------|-----------|
| <b>1. Pubmed</b> |                                                                                                                                                                                                                                                                                                                                                                                                                                                                                                                                                                     |           |
| #1               | "Phase angle"[All Fields]                                                                                                                                                                                                                                                                                                                                                                                                                                                                                                                                           | 2,766     |
| #2               | "Neoplasms"[All Fields] OR "Neoplasia"[All Fields] OR "Neoplasias"[All Fields] OR "Neoplasm"[All Fields] OR "Tumors"[All Fields] OR "Tumor"[All Fields] OR "Cancer"[All Fields] OR "Cancers"[All Fields] OR "Malignancy"[All Fields] OR "Malignancies"[All Fields] OR "Malignant Neoplasms"[All Fields] OR "Malignant Neoplasm"[All Fields] OR "Neoplasm, Malignant"[All Fields] OR "Neoplasms, Malignant"[All Fields] OR "Benign Neoplasms"[All Fields] OR "Neoplasms, Benign"[All Fields] OR "Benign Neoplasm"[All Fields] OR "Neoplasm, Benign"[All Fields]      | 5,258,557 |
| #3               | #1 AND #2                                                                                                                                                                                                                                                                                                                                                                                                                                                                                                                                                           | 249       |
| <b>2. Embase</b> |                                                                                                                                                                                                                                                                                                                                                                                                                                                                                                                                                                     |           |
| #1               | 'phase angle'/exp OR 'phase angle'                                                                                                                                                                                                                                                                                                                                                                                                                                                                                                                                  | 3,806     |
| #2               | 'neoplasms'/exp OR neoplasms OR 'neoplasia'/exp OR neoplasia OR neoplasias OR 'neoplasm'/exp OR neoplasm OR 'tumors'/exp OR tumors OR 'tumor'/exp OR tumor OR 'cancer'/exp OR cancer OR 'cancers'/exp OR cancers OR 'malignancy'/exp OR malignancy OR 'malignancies'/exp OR malignancies OR 'malignant neoplasms' OR 'malignant neoplasm'/exp OR 'malignant neoplasm' OR 'neoplasm, malignant' OR 'neoplasms, malignant' OR 'benign neoplasms' OR 'neoplasms, benign' OR 'benign neoplasm'/exp OR 'benign neoplasm' OR 'neoplasm, benign'/exp OR 'neoplasm, benign' | 7,305,563 |

|    |           |     |
|----|-----------|-----|
| #3 | #1 AND #2 | 481 |
|----|-----------|-----|

### 3. Cochrane Library

|    |                           |     |
|----|---------------------------|-----|
| #1 | ("Phase Angle" ):ti,ab,kw | 261 |
|----|---------------------------|-----|

|    |                                                                                                                                                                                                                                                                                                                                                                                                                                                                                                                          |         |
|----|--------------------------------------------------------------------------------------------------------------------------------------------------------------------------------------------------------------------------------------------------------------------------------------------------------------------------------------------------------------------------------------------------------------------------------------------------------------------------------------------------------------------------|---------|
| #2 | (Neoplasms):ti,ab,kw OR (Neoplasia):ti,ab,kw OR (Neoplasias):ti,ab,kw OR (Neoplasm):ti,ab,kw OR (Tumors):ti,ab,kw OR (Tumor):ti,ab,kw OR (Cancer):ti,ab,kw OR (Cancers):ti,ab,kw OR (Malignancy):ti,ab,kw OR (Malignancies):ti,ab,kw OR ("Malignant Neoplasms"):ti,ab,kw OR ("Malignant Neoplasm"):ti,ab,kw OR ("Neoplasm, Malignant"):ti,ab,kw OR ("Neoplasms, Malignant"):ti,ab,kw OR ("Benign Neoplasms"):ti,ab,kw OR ("Neoplasms, Benign"):ti,ab,kw OR ("Benign Neoplasm"):ti,ab,kw OR ("Neoplasm, Benign"):ti,ab,kw | 231,749 |
|----|--------------------------------------------------------------------------------------------------------------------------------------------------------------------------------------------------------------------------------------------------------------------------------------------------------------------------------------------------------------------------------------------------------------------------------------------------------------------------------------------------------------------------|---------|

|    |           |    |
|----|-----------|----|
| #3 | #1 AND #2 | 58 |
|----|-----------|----|

### 4. Medline

|    |                     |       |
|----|---------------------|-------|
| #1 | TS=("Phase Angle" ) | 2,763 |
|----|---------------------|-------|

|    |                                                                                                                                                                                                                                                                                                                                                                                                              |           |
|----|--------------------------------------------------------------------------------------------------------------------------------------------------------------------------------------------------------------------------------------------------------------------------------------------------------------------------------------------------------------------------------------------------------------|-----------|
| #2 | TS=(Neoplasms) OR TS=(Neoplasia) OR TS=(Neoplasias) OR TS=(Neoplasm) OR TS=(Tumors) OR TS=(Tumor) OR TS=(Cancer) OR TS=(Cancers) OR TS=(Malignancy) OR TS=(Malignancies) OR TS=("Malignant Neoplasms") OR TS=("Malignant Neoplasm") OR TS=("Neoplasm, Malignant") OR TS=("Neoplasms, Malignant") OR TS=("Benign Neoplasms") OR TS=("Neoplasms, Benign") OR TS=("Benign Neoplasm") OR TS=("Neoplasm, Benign") | 4,429,992 |
|----|--------------------------------------------------------------------------------------------------------------------------------------------------------------------------------------------------------------------------------------------------------------------------------------------------------------------------------------------------------------------------------------------------------------|-----------|

|    |           |     |
|----|-----------|-----|
| #3 | #1 AND #2 | 226 |
|----|-----------|-----|

### 5. Web of Science

|    |                     |        |
|----|---------------------|--------|
| #1 | TS=("Phase Angle" ) | 11,007 |
|----|---------------------|--------|

- |    |                                                                                                                                                                                                                                                                                                                                                                                                              |           |
|----|--------------------------------------------------------------------------------------------------------------------------------------------------------------------------------------------------------------------------------------------------------------------------------------------------------------------------------------------------------------------------------------------------------------|-----------|
| #2 | TS=(Neoplasms) OR TS=(Neoplasia) OR TS=(Neoplasias) OR TS=(Neoplasm) OR TS=(Tumors) OR TS=(Tumor) OR TS=(Cancer) OR TS=(Cancers) OR TS=(Malignancy) OR TS=(Malignancies) OR TS=("Malignant Neoplasms") OR TS=("Malignant Neoplasm") OR TS=("Neoplasm, Malignant") OR TS=("Neoplasms, Malignant") OR TS=("Benign Neoplasms") OR TS=("Neoplasms, Benign") OR TS=("Benign Neoplasm") OR TS=("Neoplasm, Benign") | 3,412,398 |
| #3 | #1 AND #2                                                                                                                                                                                                                                                                                                                                                                                                    | 352       |

## 6. CINAHL

- |    |                                                                                                                                                                                                                                                                                                                                                                                                              |           |
|----|--------------------------------------------------------------------------------------------------------------------------------------------------------------------------------------------------------------------------------------------------------------------------------------------------------------------------------------------------------------------------------------------------------------|-----------|
| #1 | SU=("Phase Angle" )                                                                                                                                                                                                                                                                                                                                                                                          | 334       |
| #2 | SU=(Neoplasms) OR SU=(Neoplasia) OR SU=(Neoplasias) OR SU=(Neoplasm) OR SU=(Tumors) OR SU=(Tumor) OR SU=(Cancer) OR SU=(Cancers) OR SU=(Malignancy) OR SU=(Malignancies) OR SU=("Malignant Neoplasms") OR SU=("Malignant Neoplasm") OR SU=("Neoplasm, Malignant") OR SU=("Neoplasms, Malignant") OR SU=("Benign Neoplasms") OR SU=("Neoplasms, Benign") OR SU=("Benign Neoplasm") OR SU=("Neoplasm, Benign") | 2,312,346 |
| #3 | #1 AND #2                                                                                                                                                                                                                                                                                                                                                                                                    | 110       |
-

**Supplementary Table S2. Quality assessments of included studies using by MMAT.**

| Study                                                 | Screening Questions |    | Quantitative Non-Randomized Studies |   |   |   |   | Total | Classification |
|-------------------------------------------------------|---------------------|----|-------------------------------------|---|---|---|---|-------|----------------|
|                                                       | S1                  | S2 | 1                                   | 2 | 3 | 4 | 5 |       |                |
| Pena <i>et al.</i> <sup>[13]</sup> , 2019             | *                   | *  | *                                   | * | * | * | * | ***** | 100%           |
| Axelsson <i>et al.</i> <sup>[45]</sup> , 2018         | *                   | *  | *                                   | * | * | * | * | ***** | 100%           |
| Urbain <i>et al.</i> <sup>[49]</sup> , 2013           | *                   | *  | *                                   | * | * | * | * | ***** | 100%           |
| Norman <i>et al.</i> <sup>[34]</sup> , 2010           | *                   | *  | *                                   | * | * | * | * | ***** | 100%           |
| Maurício <i>et al.</i> <sup>[50]</sup> , 2018         | *                   | *  | *                                   | * | * | * | * | ***** | 100%           |
| Leon-Idougourram <i>et al.</i> <sup>[51]</sup> , 2022 | *                   | *  | *                                   | * | * | - | * | ***** | 80%            |
| Harter <i>et al.</i> <sup>[52]</sup> , 2017           | *                   | *  | *                                   | * | * | - | * | ***** | 80%            |
| Hui <i>et al.</i> <sup>[46]</sup> , 2014              | *                   | *  | *                                   | * | * | * | * | ***** | 100%           |
| Roccamatysi <i>et al.</i> <sup>[40]</sup> , 2021      | *                   | *  | *                                   | * | * | * | * | ***** | 100%           |
| Yates <i>et al.</i> <sup>[47]</sup> , 2020            | *                   | *  | *                                   | * | - | * | * | ***** | 80%            |
| Paiva <i>et al.</i> <sup>[44]</sup> , 2011            | *                   | *  | *                                   | * | * | * | * | ***** | 100%           |
| Cereda <i>et al.</i> <sup>[53]</sup> , 2021           | *                   | *  | *                                   | * | * | * | * | ***** | 100%           |
| Paixao <i>et al.</i> <sup>[48]</sup> , 2021           | *                   | *  | *                                   | * | * | * | * | ***** | 100%           |

Abbreviation: S1: Are there clear research questions?; S2: Do the collected data allow to address the research questions?; 1: Are the participants representative of the target population?; 2: Are measurements appropriate regarding both the outcome and intervention (or exposure)? 3: Are there complete outcome data?; 4: Are the confounders accounted for in the design and analysis?; 5: During the study period, is the intervention administered (or exposure occurred) as intended? \*: Yes; -: No; /: Can't tell.

**Supplementary Table S3. Mentioned outcomes related to SPA.**

| Study                                                 | Nutritional status | Clinical Outcomes |          |
|-------------------------------------------------------|--------------------|-------------------|----------|
|                                                       |                    | Complication      | Survival |
| Pena <i>et al.</i> <sup>[13]</sup> , 2019             | *                  | *                 | *        |
| Axelsson <i>et al.</i> <sup>[45]</sup> , 2018         |                    |                   | *        |
| Urbain <i>et al.</i> <sup>[49]</sup> , 2013           |                    |                   | *        |
| Norman <i>et al.</i> <sup>[34]</sup> , 2010           | *                  |                   | *        |
| Maurício <i>et al.</i> <sup>[50]</sup> , 2018         |                    | *                 |          |
| Leon-Idougourram <i>et al.</i> <sup>[51]</sup> , 2022 | *                  |                   |          |
| Harter <i>et al.</i> <sup>[52]</sup> , 2017           |                    | *                 |          |
| Hui <i>et al.</i> <sup>[46]</sup> , 2014              |                    |                   | *        |
| Roccamatysi <i>et al.</i> <sup>[40]</sup> , 2021      |                    | *                 |          |
| Yates <i>et al.</i> <sup>[47]</sup> , 2020            | *                  |                   | *        |
| Paiva <i>et al.</i> <sup>[44]</sup> , 2011            |                    |                   | *        |
| Cereda <i>et al.</i> <sup>[53]</sup> , 2021           | *                  |                   | *        |
| Paixao <i>et al.</i> <sup>[48]</sup> , 2021           |                    |                   | *        |

Abbreviation: \*: mentioned.
